# Predictors of Microalbuminuria in Individuals with IDDM

## Pittsburgh Epidemiology of Diabetes Complications Study

BETH ANN COONROD, PHD  
 DEMETRIUS ELLIS, MD  
 DOROTHY J. BECKER, MBBCh  
 CLAREANN H. BUNKER, PHD  
 SHERYL F. KELSEY, PHD

CATHY E. LLOYD, PHD  
 ALLAN L. DRASH, MD  
 LEWIS H. KULLER, MD  
 TREVOR J. ORCHARD, MBBCh

**OBJECTIVE**— To examine the relationships between microalbuminuria and the development of overt diabetic nephropathy, elevated blood pressure, and a more atherogenic lipid profile; and to identify risk factors for the development of microalbuminuria in individuals with IDDM. Microalbuminuria has been associated with the subsequent development of overt diabetic nephropathy in individuals with IDDM. It is associated with elevated blood pressure and a more atherogenic lipid profile, but the temporal relationship between the development of microalbuminuria and the changes in these factors is unclear.

**RESEARCH DESIGN AND METHODS**— Baseline characteristics were examined in 256 individuals with IDDM who had normal albumin excretion (urinary AER  $\leq 20$   $\mu\text{g}/\text{min}$  in  $\geq 2$  timed urine collections) and were re-examined 2 yr later.

**RESULTS**— At follow-up, 24 had developed microalbuminuria (AER 20–200  $\mu\text{g}/\text{min}$  in  $\geq 2$  timed urine collections) and 1 had developed overt nephropathy (AER  $> 200$   $\mu\text{g}/\text{min}$ ). Overall, the significant independent predictors of microalbuminuria were HbA<sub>1c</sub> ( $P < 0.001$ ), low-density lipoprotein ( $P < 0.01$ ), duration of IDDM ( $P < 0.05$ ), and systolic blood pressure ( $P = 0.05$ ). Sex-specific analyses showed HbA<sub>1c</sub>, age, and baseline AER were particularly important for men; whereas, for women, the main predictors were duration of IDDM and triglycerides. Duration-specific analyses showed that HbA<sub>1c</sub> was an important predictor both for individuals with  $<$  and  $> 20$ -yr duration. Low-density lipoprotein cholesterol was more important for subjects with shorter durations; whereas triglycerides were important for those with longer durations.

**CONCLUSIONS**— These results suggest that glycemic control, age or duration of IDDM, disturbed lipids, and possibly elevated blood pressure all may contribute to the development of microalbuminuria; and, further, that the adverse cardiovascular risk profile seen in individuals with overt nephropathy may begin to develop even before the detection of microalbuminuria.

From the Department of Epidemiology, Graduate School of Public Health, University of Pittsburgh, Pittsburgh; the Divisions of Nephrology and Pediatric Endocrinology, Metabolism and Diabetes Mellitus, Children's Hospital of Pittsburgh, Pittsburgh, Pennsylvania; and the National Institute of Diabetes and Digestive and Kidney Diseases, National Institutes of Health, Bethesda, Maryland.

Address correspondence and reprint requests to Trevor J. Orchard, MBBCh, Diabetes Research Center of Children's Hospital of Pittsburgh, Fifth Floor, Rangos Research Center, 3460 Fifth Avenue, Pittsburgh, PA 15213.

Received for publication 7 June 1993 and accepted in revised form 21 June 1993.

IDDM, insulin-dependent diabetes mellitus; AER, albumin excretion rate; BP, blood pressure; sBP, systolic blood pressure; dBp, diastolic blood pressure; EDC, Epidemiology of Diabetes Complications; CV, coefficient of variation; CI, confidence interval; BMI, body mass index; LDL, low-density lipoprotein; apoB, apoprotein B; apoA-I, apoprotein A-I; apoA-II, apoprotein A-II.

Microalbuminuria appears to be a predictor of overt diabetic nephropathy (1–4), which is the leading cause of end-stage renal disease in the U.S. (5), and a leading cause of death (6) and cardiovascular disease (7) in individuals with IDDM. Whether all individuals with microalbuminuria will necessarily progress to overt nephropathy is not known. However, it is clear that all individuals with overt nephropathy must pass through the stage of microalbuminuria; thus, a clearer understanding of the etiology and early natural history of microalbuminuria is central to the possible prevention of this major complication. A key issue is whether the elevated BP (4,8–10) and more atherogenic lipid profile (11–13) seen in microalbuminuric individuals are results, or potential causes, of microalbuminuria. Determining whether these factors predict microalbuminuria will help establish intervention strategies at the earliest possible stage.

### RESEARCH DESIGN AND METHODS

This study is based on the population of the EDC study (14,15). This is a 10-yr prospective study in which the participants are evaluated every 2 yr. This report focuses on 256 individuals who were normoalbuminuric at baseline, 1986–1988 (cycle 1), and returned for follow-up (cycle 2) examination. Subjects were diagnosed with IDDM at  $< 17$  yr of age during 1950–1980 and are not under the care of the investigators.

Approximately two weeks before their scheduled clinic appointment, participants were sent urine containers and instructions in the proper collection of a 24-h and an overnight urine specimen. At the beginning of the clinic appointment, the participants were instructed to completely empty their bladders; this void was collected and is referred to as the preclinic sample. A timed postclinic ( $\sim 4$ -h) collection also was obtained over the course of the clinic visit. Thus, for

most subjects, all urine collections were made within a 2-wk period.

To be classified into one of the categories of normoalbuminuria (AER  $\leq 20$   $\mu\text{g}/\text{min}$ ), microalbuminuria (AER 20–200  $\mu\text{g}/\text{min}$ ), or overt nephropathy (AER  $> 200$   $\mu\text{g}/\text{min}$ ), an individual must have had at least two urine collections with an AER in the corresponding range (16). One woman at cycle 1 with overt nephropathy, which was attributable to pregnancy, was excluded.

Urinary albumin concentrations were measured within 1 mo of storage at  $-20^{\circ}\text{C}$  using an immunonephelometric technique (17,18). This assay has a sensitivity of 0.0004 g/L, an intra-assay CV of 3%, and an interassay CV of 9.5%. Urinary creatinine concentrations were measured using an Ektachem 400 Analyzer (Eastman Kodak Co., Rochester, NY). As incomplete bladder emptying, inaccurate timing of urine collections, and the discarding of voids during the course of timed urine collections all can affect the accuracy of urine-collection parameters, the adequacy of each collection was determined by referring to its measured creatinine excretion. If a urine sample was deemed inadequate (197 of 1379 samples [14%] for the 256 participants presented, both cycles combined), the AER was calculated from the product of the urinary albumin/creatinine ratio of that sample and the calculated 24-h creatinine excretion (based on the participant's age and sex). The albumin/creatinine ratio also was used to calculate an AER for the preclinic urine if another AER was needed because an individual's nephropathy status could not be determined based on the other urine collections ( $n = 18$  at cycle 1, all classified as normoalbuminuric; and 24 at cycle 2, with 20 normoalbuminuric and 4 microalbuminuric).

BP was measured 3 times after a 5-min rest in the sitting position using a Random Zero Sphygmomanometer (Hawksley, England). The mean of the second and third readings was used. Hypertension was defined as sBP  $> 140$

mmHg and/or dBP  $> 90$  mmHg, and/or taking antihypertensive medication. A positive family history of hypertension was defined as reported hypertension in a first-degree relative in a questionnaire. Smoking history and information regarding the use of oral contraceptives were elicited via questionnaire. The methods used for other measurements have been described earlier (19).

As the length of time between cycle 1 and cycle 2 evaluations varied somewhat among participants, incidence rates were measured as incidence density. The statistical significance of differences in group means (those who progressed to microalbuminuria or overt nephropathy versus those who remained normoalbuminuric) was tested using the Mann-Whitney U test statistic. Multiple logistic regression analyses were used to identify significant independent predictors of microalbuminuria.

**RESULTS**— At cycle 1 of the EDC study, nephropathy status could be determined in 649 individuals: 170 had overt nephropathy and 140 had microalbuminuria (22 of whom regressed to normal at cycle 2). In addition, 339 (52%) were normoalbuminuric at cycle 1. Of these 339 subjects, 256 could be classified by nephropathy status 2 yr later at cycle 2 (76 did not return, and 7 could not be classified because of incomplete data). Those classified and those not classified at follow-up did not differ by sex or duration of IDDM; however, those that were classified were older than those not classified (age at cycle 1: 25.7 vs. 23.6 yr,  $P < 0.05$ ): Of these 256 individuals, 231 (90.2%; 115 men, 116 women) were again normoalbuminuric at cycle 2, 24 (9.4%; 9 men, 15 women) were microalbuminuric at cycle 2, and 1 (0.4%; woman) had overt nephropathy (but not renal failure) at cycle 2. This yielded an overall incidence density of microalbuminuria (including the woman with overt nephropathy) of 4.8 cases/100 person-yr of follow-up. Whereas for those with a duration  $< 20$  yr, incidence

density was 3.5%; and, for those with duration  $> 20$  yr, it was twice as high (7.3%). For men, the incidence density was 3.6, and for women, the incidence density was 5.9 cases/100 person-yr of follow-up. The baseline characteristics of those who developed microalbuminuria or overt nephropathy were compared with those who did not, stratifying by duration (Tables 1 and 2). Compared with individuals who were normoalbuminuric at both cycles, those who progressed from normoalbuminuria to microalbuminuria or overt nephropathy had, at cycle 1, higher levels of HbA<sub>1c</sub>, serum triglycerides, and apoB. For those with duration  $< 20$  yr, LDL-cholesterol and apoA-I concentrations also were higher in those who progressed, whereas apoA-II and fibrinogen concentrations were higher in progressors with a duration  $> 20$  yr. Age, duration, and BP showed only weak nonsignificant increases. Those who progressed to microalbuminuria were not (either overall or by duration group) more likely to have ever been a smoker compared with those who did not progress (33 vs. 27%, overall, respectively) or to have a positive family history of hypertension (56 vs. 41%, overall, respectively). Table 3—which presents relative risks for developing microalbuminuria by specified levels of risk factors—confirms these duration-specific results from Tables 1 and 2, namely that increased HbA<sub>1c</sub> (relative risk 3.6), LDL cholesterol (2.5), triglycerides (3.1), apoA-I (2.6), and apoB (3.4) all are associated with progression to microalbuminuria. Multiple logistic regression analyses showed HbA<sub>1c</sub>, LDL cholesterol, duration of IDDM, and sBP were significant independent predictors of microalbuminuria overall. LDL cholesterol was particularly important in the model for shorter-duration ( $< 20$  yr) subjects, whereas triglycerides and sBP ( $P = 0.06$ ) were predictive in longer-duration subjects (Table 4).

In the men, those who progressed to microalbuminuria were significantly older (30.1 vs. 24,  $P < 0.05$ ), and

**Table 1—Host characteristics at cycle 1 by cycle 2 status stratified by duration of IDDM at cycle 1**

|                           | Normoalbuminuric<br>at cycle 2 | Microalbuminuric*<br>at cycle 2 | P value |
|---------------------------|--------------------------------|---------------------------------|---------|
| Sex (n [% male])          |                                |                                 |         |
| <20 yr IDDM duration      | 159 (54.7)                     | 12 (33.3)                       | NS      |
| ≥20 yr IDDM duration      | 72 (38.9)                      | 13 (38.5)                       | NS      |
| Age at diagnosis (yr)†    |                                |                                 |         |
| <20 yr IDDM duration      | 8.9 ± 4.2                      | 9.6 ± 4.4                       | NS      |
| ≥20 yr IDDM duration      | 7.6 ± 4.0                      | 7.9 ± 4.3                       | NS      |
| Age (yr)†                 |                                |                                 |         |
| <20 yr IDDM duration      | 21.7 ± 5.7                     | 22.8 ± 4.3                      | NS      |
| ≥20 yr IDDM duration      | 33.4 ± 5.2                     | 35.2 ± 5.9                      | NS      |
| Duration of IDDM (yr)†    |                                |                                 |         |
| <20 yr                    | 12.8 ± 3.6                     | 13.1 ± 4.0                      | NS      |
| ≥20 yr                    | 25.7 ± 3.9                     | 27.2 ± 4.1                      | NS      |
| HbA <sub>1c</sub> (%)†    |                                |                                 |         |
| <20 yr IDDM duration      | 10.2 ± 1.7                     | 12.2 ± 2.7                      | <0.05   |
| ≥20 yr IDDM duration      | 9.3 ± 1.3                      | 10.5 ± 1.3                      | <0.01   |
| BMI (kg/m <sup>2</sup> )† |                                |                                 |         |
| <20 yr IDDM duration      | 22.9 ± 3.5                     | 23.8 ± 3.3                      | NS      |
| ≥20 yr IDDM duration      | 23.6 ± 2.5                     | 23.1 ± 2.8                      | NS      |
| AER (μg/min)‡             |                                |                                 |         |
| 24 h                      |                                |                                 |         |
| <20 yr IDDM duration      | 9 (0.5–87)                     | 10 (5–29)                       | NS      |
| ≥20 yr IDDM duration      | 9 (1–117)                      | 13 (3–35)                       | NS      |
| Overnight                 |                                |                                 |         |
| <20 yr IDDM duration      | 6 (1–48)                       | 8 (4–21)                        | NS      |
| ≥20 yr IDDM duration      | 6 (0.5–46)                     | 8 (2.5–12)                      | NS      |
| Postclinic                |                                |                                 |         |
| <20 yr IDDM duration      | 7 (2–105)                      | 7 (5–32)                        | NS      |
| ≥20 yr IDDM duration      | 8 (1–58)                       | 11 (3–26)                       | NS      |

\*Includes one subject with normoalbuminuria at cycle 1 and overt nephropathy at cycle 2.

†Data are means ± SD.

‡Data are median (range).

had significantly higher levels of HbA<sub>1c</sub> (11.6 vs. 9.9%,  $P < 0.01$ ), sBP (121 vs. 110 mmHg,  $P < 0.05$ ), LDL cholesterol (3.39 vs. 2.56 mM,  $P < 0.01$ ), triglycerides (1.74 vs. 0.94 mM,  $P < 0.05$ ), apoB (1.16 vs. 0.90 g/L,  $P < .01$ ), and fibrinogen (3.19 vs. 2.45 g/L,  $P < 0.05$ ). They also had a significantly higher postclinic AER (12 vs. 8 μg/min,  $P < 0.05$ ). Multiple logistic regression analyses (using a maximum of eight independent variables) showed that HbA<sub>1c</sub>, age, and post-clinic AER were significant independent predictors of microalbuminuria, with LDL cholesterol remaining in the model at  $P = 0.07$  (Table 4).

In the women, those who progressed to microalbuminuria (or overt nephropathy) had a longer duration of IDDM, which was not significant univariately (21.0 vs. 17.9 yr,  $P = 0.12$ ), and significantly higher levels of HbA<sub>1c</sub> (11.2 vs. 9.9%,  $P < 0.05$ ), triglycerides (1.29 vs. 0.82 mM,  $P < 0.01$ ), apoA-I (1.48 vs. 1.38 g/L,  $P < 0.05$ ), and apoA-II (0.48 vs. 0.44 g/L,  $P < 0.05$ ). Multiple logistic regression analyses (using a maximum of five independent variables) showed that duration of IDDM and triglycerides were significant independent predictors of microalbuminuria, with HbA<sub>1c</sub> remaining in the model at

$P = 0.08$  (Table 4). Thus, time-related variables (age in men, IDDM duration in women), along with HbA<sub>1c</sub>, are the major common risk factors in both men and women. Though triglycerides were significant in women and LDL cholesterol in men, because sex lipid interaction terms were not significant in the overall model, it remains unclear whether the lipoprotein association truly differs by sex.

**CONCLUSIONS**— This study revealed an incidence density of microalbuminuria of 4.8 cases/100 person-yr of follow-up. The twofold higher incidence in those with a duration >20 yr is particularly interesting; although, given the small number of cases (13), these duration-specific rates cannot be considered definitive. The incidence of microalbuminuria is not well established and, for the most part, incidence data must be extrapolated from studies designed to investigate other hypotheses. Four other studies were found from which incidence data could be derived (Table 5). Compared with these studies (20–23), the present study found a similar incidence rate. The lower rates in Jerums et al.'s (20) study probably were a result of 40% of the participants being newly diagnosed. The reason for the higher rates in Raal et al.'s (23) study is not clear.

One major problem with any study of microalbuminuria is that of definition. The critical lower limits of microalbuminuria have varied from 15 (short-term collection) (3) to 70 g/min (24-h collection) (4). Note that, although AER is reduced at night, the best predictive cutoff in the study that used overnight urines was still 30 g/min (1). In view of this variability, we have adopted a compromise proposed by a group of investigators (16). That is, microalbuminuria corresponds to an AER of 20–200 μg/min; although it should be noted that results may vary if different limits were chosen for the various types of samples. Another factor that may influence results, is the potential survivor

**Table 2—Risk factors at cycle 1 by cycle 2 status stratified by duration of IDDM at cycle 1**

| Risk factors:        | Normoalbuminuric<br>at cycle 2 | Microalbuminuric*<br>at cycle 2 | P value |
|----------------------|--------------------------------|---------------------------------|---------|
| <20 yr IDDM duration |                                |                                 |         |
| ≥20 yr IDDM duration |                                |                                 |         |
| sBP (mmHg)           |                                |                                 |         |
| <20 yr IDDM duration | 106 ± 10                       | 109 ± 9                         | NS      |
| ≥20 yr IDDM duration | 111 ± 11                       | 118 ± 14                        | NS      |
| dBp (mmHg)           |                                |                                 |         |
| <20 yr IDDM duration | 68 ± 8                         | 69 ± 7                          | NS      |
| ≥20 yr IDDM duration | 71 ± 8                         | 73 ± 5                          | NS      |
| Hypertension         |                                |                                 |         |
| <20 yr IDDM duration | 0/159                          | 0/12                            | —       |
| ≥20 yr IDDM duration | 5/72 (6.9)                     | 3/13 (23.1)                     | NS      |
| HDL cholesterol (mM) |                                |                                 |         |
| <20 yr IDDM duration | 1.40 ± 0.26                    | 1.45 ± 0.26                     | NS      |
| ≥20 yr IDDM duration | 1.50 ± 0.39                    | 1.40 ± 0.31                     | NS      |
| LDL cholesterol (mM) |                                |                                 |         |
| <20 yr IDDM duration | 2.56 ± 0.59                    | 3.31 ± 0.83                     | <0.01   |
| ≥20 yr IDDM duration | 2.72 ± 0.59                    | 3.10 ± 0.88                     | NS      |
| Triglycerides (mM)   |                                |                                 |         |
| <20 yr IDDM duration | 0.94 ± 0.51                    | 1.43 ± 0.89                     | <0.05   |
| ≥20 yr IDDM duration | 0.76 ± 0.35                    | 1.47 ± 1.06                     | <0.001  |
| Apoproteins (g/L)    |                                |                                 |         |
| apoA-I               |                                |                                 |         |
| <20 yr IDDM duration | 135 ± 17                       | 144 ± 17                        | <0.05   |
| ≥20 yr IDDM duration | 138 ± 18                       | 146 ± 15                        | NS      |
| apoA-II              |                                |                                 |         |
| <20 yr IDDM duration | 44 ± 9                         | 47 ± 8                          | NS      |
| ≥20 yr IDDM duration | 43 ± 8                         | 49 ± 8                          | <0.05   |
| apoB                 |                                |                                 |         |
| <20 yr IDDM duration | 88 ± 23                        | 106 ± 26                        | <0.05   |
| ≥20 yr IDDM duration | 93 ± 23                        | 106 ± 25                        | 0.06    |
| Fibrinogen (g/l)     |                                |                                 |         |
| <20 yr IDDM duration | 2.7 ± 0.8                      | 2.7 ± 0.4                       | NS      |
| ≥20 yr IDDM duration | 2.5 ± 0.7                      | 3.1 ± 1.3                       | <0.05   |

Data are means ± SD. Risk factors are < 20 yr IDDM duration and ≥ 20 yr IDDM duration.

\*Includes 1 subject with normoalbuminuria at cycle 1 and over nephropathy at cycle 2.

has not always shown an association with microalbuminuria (9).

Previous data on the relationship between glycemic control and microalbuminuria are equivocal. Some studies have reported a significantly higher HbA<sub>1c</sub> in microalbuminuric individuals (4,8,10), whereas others have reported no significant difference (25). We have reported previously that at a duration of 5 yr of IDDM, girls (but not boys) with microalbuminuria had a higher mean HbA<sub>1c</sub> since diagnosis than those without (26). At a longer duration of IDDM, this study has found glycemic control plays a stronger predictive role in men than women. Thus, it appears that poor glycemic control may accelerate the development of microalbuminuria in both sexes, but that this acceleration occurs earlier in women.

Some studies (27,28)—although not all (29)—have shown that poor glycemic control in the first years of IDDM is associated with the subsequent development of persistent proteinuria or overt nephropathy. Other studies have shown that achieving strict metabolic control via continuous subcutaneous insulin infusion has a beneficial effect of slowing or preventing the progression of diabetic nephropathy in microalbuminuric individuals (30,31)—but not in individuals who have already reached the stage of persistent proteinuria (32). These studies suggest that a point of no return is reached in the development of diabetic nephropathy, after which glycemic control plays less of a role.

This study, showing that glycemic control is a predictor of microalbuminuria, provides important confirmation of these earlier studies by documenting for the first time the predictive power of glycemic control in the context of many other risk factors in an epidemiological population of IDDM individuals. These results also add support to those who advocate monitoring for microalbuminuria, a stage at which intensive efforts to achieve good glycemic control may be of benefit.

bias for longer-duration subjects, i.e., some of the sicker individuals may have died earlier. Indeed, 147 subjects, otherwise eligible for EDC, died before recruitment started (15). This may explain why certain risk factors (e.g., LDL cholesterol) may be a stronger predictor in shorter-duration subjects (e.g., those with a high LDL cholesterol may be more likely to die earlier).

The significant independent predictors of microalbuminuria found in

this study are summarized in Table 4. Of all the risk factors examined, glycemic control was the only one found to be a predictor of microalbuminuria in both men and women, and at short and long durations. This and time-related variables (age in men and IDDM duration in women) appeared to be the most important predictors of the development of microalbuminuria. Duration of IDDM generally has been the strongest risk factor for overt nephropathy (14,24), but

**Table 3—Relative risks for developing microalbuminuria over 2-yr period by baseline risk factors**

|                       | Cut points |           | Relative risk<br>(95% CI) |
|-----------------------|------------|-----------|---------------------------|
|                       | Low risk   | High risk |                           |
| HbA <sub>1c</sub> (%) | <10        | ≥10       | 3.56 (1.47–8.63)          |
| sBP (mmHg)            | ≤120       | >120      | 1.43 (0.53–3.90)          |
| dBP (mmHg)            | ≤80        | >80       | 0.42 (0.06–2.98)          |
| HDL cholesterol (mM)  | ≥1.29      | <1.29     | 1.12 (0.53–2.40)          |
| LDL cholesterol (mM)  | <2.59      | ≥2.59     | 2.47 (1.06–5.74)          |
| Triglycerides (mM)    | <1.13      | ≥1.13     | 3.14 (1.51–6.49)          |
| Apoproteins (g/L)     |            |           |                           |
| apoA-I                | <1.40      | ≥1.40     | 2.63 (1.18–5.87)          |
| apoA-II               | <.45       | ≥.45      | 2.07 (0.95–4.50)          |
| apoB                  | <1.00      | ≥1.00     | 3.40 (1.60–7.24)          |
| Fibrinogen (g/L)      | <2.50      | ≥2.50     | 2.23 (0.97–5.16)          |

There is little question that BP is elevated, although still within the normal range, in IDDM individuals with microalbuminuria compared with normoalbuminuric IDDM individuals (4,8,9). However, whether BP rises before or after the development of microalbuminuria has been debated considerably. Two other studies of normoalbuminuric IDDM individuals monitored prospectively to identify incident cases of microalbuminuria, and that document BP changes, have been fully reported. Mathiesen et al. (21) found no difference in BP between those who did and those who did not develop persistent microalbuminuria until the third year of microalbuminuria, indicating that BP elevation is secondary to the initiation of diabetic nephropathy. Raal et al. (23) found no difference in BP at baseline between individuals who remained normoalbuminuric and those who later progressed to microalbuminuria; however, they found the development of microalbuminuria was accompanied by a rise in dBP, indicating that BP elevation and the development of microalbuminuria are concurrent events. Another study (33) was based on IDDM subjects with a duration of 15–21 yr, selected on the basis of retinopathy status. BP readings abstracted from clinic records for these pa-

tients during adolescence or young adulthood were not higher in those who had microalbuminuria when compared with control subjects. However, a further study (34), which followed 137 normoalbuminuric IDDM subjects with a mean duration of 14 yr for 4 yr, found that those who progressed to microalbuminuria had higher mean BP at baseline as well as a higher AER and HbA<sub>1c</sub>. Unlike this study, a history of smoking also was predictive (34). Unfortunately, lipid measures were not reported. This study, therefore, is consistent with this U.K. study and suggests that BP may rise before the detection of microalbuminuria and may even serve as a predictor of its development. We do not believe that antihypertensive medication use influenced these results because 98% of the participants were not taking such medication at baseline and only 3 participants (2 with microalbuminuria) started taking BP medication between exams. In addition, BP medication use was not a significant predictor in the multiple logistic regression analyses.

Several studies have compared, cross-sectionally, lipid levels between normoalbuminuric and microalbuminuric IDDM individuals (11–13), including the recent baseline analysis of renal function in the Diabetes Control and Com-

plications Trial (35). Only one of these studies found microalbuminuric individuals had a significantly higher mean level of LDL cholesterol (13); however, in studies that included a group with overt nephropathy (11,12), the level of LDL cholesterol in the microalbuminuria group fell in between the levels in the normoalbuminuria and overt nephropathy groups. The same was true for total cholesterol, apoB, and triglycerides. It is well established that individuals with overt nephropathy have higher total and LDL cholesterol and triglyceride levels (7,11,12).

The major new finding of this study is that LDL cholesterol and triglycerides levels, although in the normal range, are elevated in those destined to later become microalbuminuric. This raises a new and important potential avenue for prevention (i.e., lipid correction). The potential that raised cholesterol is involved in the pathogenesis of microalbuminuria is supported by both animal experimental studies and clinical studies, which have been reviewed recently (36). These studies suggest a number of similarities between atherosclerosis and glomerulosclerosis, in particular the presence of lipid-filled monocytes in both atherosclerotic plaques and the mesangium, and similar proliferation of vascular smooth muscle cells (atherosclerosis) and mesangial cells (glomerulosclerosis).

Sodium lithium countertransport activity traditionally has been viewed as a genetic marker for predisposition to essential hypertension (37). This activity has received increased attention in diabetic individuals since Krolewski et al. (38) and Mangili et al. (39) reported it as elevated in individuals with diabetic nephropathy, including individuals with microalbuminuria. This has led to the hypothesis that genetic predisposition to hypertension determines who develops renal complications. However, these studies were cross-sectional, and sodium lithium countertransport activity has been positively correlated with factors

Table 4—Multiple logistic regression results: overall, by sex and IDDM duration

| Risk factor (at cycle 1) | Coefficient | Coefficient/SE | P value |
|--------------------------|-------------|----------------|---------|
| Men and women combined   |             |                |         |
| HbA <sub>1c</sub>        | 0.5315      | 3.767          | <0.001  |
| LDL cholesterol          | 0.0252      | 2.722          | <0.01   |
| Duration of IDDM         | 0.0828      | 2.372          | <0.05   |
| sBP                      | 0.0428      | 1.938          | 0.05    |
| BP-lowering medication   | -0.5370     | -0.407         | NS      |
| Men                      |             |                |         |
| HbA <sub>1c</sub>        | 1.0591      | 2.713          | <0.01   |
| Age                      | 0.2057      | 2.336          | <0.05   |
| AER (postclinic)         | 0.2783      | 2.180          | <0.05   |
| LDL cholesterol          | 0.0444      | 1.804          | 0.07    |
| Women                    |             |                |         |
| Duration of IDDM         | 0.0987      | 2.379          | <0.05   |
| Triglycerides            | 0.0139      | 2.101          | <0.05   |
| HbA <sub>1c</sub>        | 0.3064      | 1.743          | 0.08    |
| IDDM duration < 20 yr    |             |                |         |
| LDL cholesterol          | 0.3650      | 2.919          | <0.01   |
| HbA <sub>1c</sub>        | 0.4390      | 2.709          | <0.01   |
| IDDM duration > 20 yr    |             |                |         |
| Triglycerides            | 0.0217      | 2.591          | <0.01   |
| HbA <sub>1c</sub>        | 0.6417      | 2.249          | <0.05   |
| sBP                      | 0.0579      | 1.905          | 0.06    |

Individuals who were normoalbuminuric at both cycles were coded as 0, and individuals who were normoalbuminuric at cycle 1, but had microalbuminuria or overt nephropathy at cycle 2, were coded as 1.

such as total cholesterol, triglycerides, and apoB (40,41)—which also are elevated in IDDM individuals with microalbuminuria and overt nephropathy.

Unfortunately, measurement of sodium lithium countertransport activity was available for only 51 individuals in this study, 4 of whom developed microalbuminuria. Although the difference in the means of those who progressed

(0.41 mmol lithium/L red blood cell/h) compared with those who did not (0.37 mmol lithium/L red blood cell/h) was much smaller than the previous studies (37,38), our sample size is too small to draw any conclusions. Some studies have noted that sodium lithium countertransport activity is increased only in those hypertensive individuals with a positive family history of hypertension (42,43).

Therefore, the lack of a significant difference in the prevalence of a positive family history of hypertension between the two groups in this study may relate to the lack of difference in sodium lithium countertransport activity. Another study has failed to find elevated sodium lithium countertransport activity in IDDM individuals with nephropathy, but data on family history of hypertension were not presented (44).

An alternative hypothesis, the Steno hypothesis (45), suggests two factors (genetic predisposition and glycemic control) lead to complications, but proposes that the genetic component is a genetically conferred susceptibility to the deleterious effects of hyperglycemia rather than a predisposition to hypertension. Both theories imply the existence of a subgroup of individuals who are at risk; and, that this subgroup is identifiable by a genetically determined characteristic. They cite this subgroup as comprising the 35–45% of IDDM individuals who are commonly reported to develop nephropathy. Previously published data from the EDC study—which reported a combined prevalence of microalbuminuria and overt nephropathy at  $\geq 30$ -yr duration of IDDM of 84% in men and 59% in women—suggest that most IDDM individuals will develop some form of nephropathy with time (14). It might, therefore, be more prudent to search for factors that accelerate the development of nephropathy rather than search for a genetically determined

Table 5—Studies reporting incidence data for microalbuminuria

|                              | Normoalbuminuric at baseline (n) | Developed microalbuminuria (n) | Length of follow-up (yr) | Incidence density (cases/100 person-yr of follow-up) |      |       |
|------------------------------|----------------------------------|--------------------------------|--------------------------|------------------------------------------------------|------|-------|
|                              |                                  |                                |                          | All                                                  | Men  | Women |
| Jerums et al. (20) (1987)    | 48                               | 4                              | mean 7.8                 | ~1.1                                                 | ~1.2 | ~0.9  |
| Mathiesen et al. (21) (1990) | 205                              | 15                             | 2                        | 3.7                                                  | 3.5  | 3.8   |
| Rudberg (22) (1991)          | 53                               | 15                             | 8                        | 3.5                                                  | ?    | ?     |
| Raal et al. (23) (1992)      | 39                               | 7                              | mean 2.2                 | ~8.2                                                 | ~6.5 | ~10.1 |
| Present study                | 256                              | 25                             | mean 2                   | 4.8                                                  | 3.6  | 5.9   |

subgroup at risk. Indeed, a wide range in the rate of progression of albuminuria has been noted (46).

This investigation found glycemic control and time-related variables (age or duration of IDDM) were the most important predictors of microalbuminuria. A new finding is the predictive role for LDL cholesterol, which has pathogenetic relevance and preventive potential. A weaker role for BP and familial hypertension was found compared with some previous studies, although sodium lithium countertransport activity data was only available on a small group. Thus, though factors such as age and duration of IDDM cannot be modified, this study suggests that good glycemic control, correction of even modest LDL-cholesterol elevations, and low-normal BP (intervention strategies that require formal clinical trial evaluation) may help prevent, slow, or delay the development of diabetic nephropathy.

**Acknowledgments**— This research was supported by National Institutes of Health Grant DK-34-818.

We thank Susan G. Berry for expert technical assistance.

## References

- Viberti GC, Hill RD, Jarrett RJ, Argyropoulos A, Mahmud U, Keen H: Microalbuminuria as a predictor of clinical nephropathy in insulin-dependent diabetes mellitus. *Lancet* 1:1430-32, 1982
- Parving H-H, Oxenboll B, Svendsen PA, Sandahl Christiansen J, Andersen AR: Early detection of patients at risk of developing diabetic nephropathy: a longitudinal study of urinary albumin excretion. *Acta Endocrinol* 100:550-55, 1982
- Mogensen CE, Christensen CK: Predicting diabetic nephropathy in insulin-dependent patients. *N Engl J Med* 311: 89-93, 1984
- Mathiesen ER, Oxenboll B, Johnsen K, Svendsen PA, Deckert T: Incipient nephropathy in Type 1 (insulin-dependent) diabetes. *Diabetologia* 26:406-10, 1984
- Consensus statement. *Am J Kidney Dis* 13:2-6, 1989
- Dorman JS, LaPorte RE, Kuller LH, Cruickshanks KJ, Orchard TJ, Wagener DK, Becker DJ, Cavender DE, Drash AL: The Pittsburgh insulin-dependent diabetes mellitus (IDDM) morbidity and mortality study: mortality results. *Diabetes* 33:271-76, 1984
- Jensen T, Borch-Johnsen K, Kofoed-Enevoldsen A, Deckert T: Coronary heart disease in young Type 1 (insulin-dependent) diabetic patients with and without diabetic nephropathy: incidence and risk factors. *Diabetologia* 30:144-48, 1987
- Wiseman M, Viberti G, Mackintosh D, Jarrett RJ, Keen H: Glycaemia, arterial pressure and microalbuminuria in type 1 (insulin-dependent) diabetes mellitus. *Diabetologia* 26: 401-05, 1984
- Feldt-Rasmussen B, Borch-Johnsen K, Mathiesen ER: Hypertension in diabetes as related to nephropathy. Early blood pressure changes. *Hypertension* 7 (Suppl 2.):18-20, 1985
- Klein R, Klein BEK, Linton KLP, Moss SE: Microalbuminuria in a population-based study of diabetes. *Arch Intern Med* 152:153-58, 1992
- Vannini P, Ciavarella A, Flammini M, Bargossi AM, Forlani G, Borgnino LC, Orsoni G: Lipid abnormalities in insulin-dependent diabetic patients with albuminuria. *Diabetes Care* 7:151-54, 1984
- Jensen T, Stender S, Deckert T: Abnormalities in plasma concentrations of lipoproteins and fibrinogen in type 1 (insulin-dependent) diabetic patients with increased urinary albumin excretion. *Diabetologia* 31:142-45, 1988
- Jones SL, Close CF, Mattock MB, Jarrett RJ, Keen H, Viberti GC: Plasma lipid and coagulation factor concentrations in insulin dependent diabetics with microalbuminuria. *Br Med J* 298:487-90, 1989
- Orchard TJ, Dorman JS, Maser RE, Becker DJ, Drash AL, Ellis D, LaPorte RE, Kuller LH: Prevalence of complications in IDDM by sex and duration: Pittsburgh epidemiology of diabetes complications study II. *Diabetes* 39:1116-24, 1990
- Donahue RP, Orchard TJ: Diabetes mellitus and macrovascular complications: an epidemiological perspective. *Diabetes Care* 15:1141-55, 1992
- Mogensen CE, Chachati A, Christensen CK, Close CF, Deckert T, Hommel E, Kastrup J, Lefebvre P, Mathiesen ER, Feldt-Rasmussen B, Schmitz A, Viberti GC: Microalbuminuria: An early marker of renal involvement in diabetes. *Uremia Investigation* 9:85-95, 1985-86
- Ellis D, Buffone GJ: New approach to evaluation of proteinuric states. *Clin Chem* 23:666-79, 1977
- Ellis D, Becker DJ: Editorial reply. *J Pediatr* 104:324-25, 1984
- Orchard TJ, Dorman JS, Maser RE, Becker DJ, Ellis D, LaPorte RE, Kuller LH, Wolfson SK Jr, Drash AL: Factors associated with avoidance of severe complications after 25 yr of IDDM: Pittsburgh Epidemiology of Diabetes Complications Study I. *Diabetes Care* 13:741-47, 1990
- Jerums G, Cooper ME, Seeman E, Murray RML, McNeil JJ: Spectrum of proteinuria in type I and type II diabetes. *Diabetes Care* 10:419-27, 1987
- Mathiesen ER, Ronn B, Jensen T, Storm B, Deckert T: Relationship between blood pressure and urinary albumin excretion in development of microalbuminuria. *Diabetes* 39:245-49, 1990
- Rudberg S: Increased glomerular filtration rate predicts diabetic nephropathy—results from an 8-year study. In *Epidemiological and Pathophysiological Studies on the Development of Diabetic Nephropathy*. [Dissertation]. Stockholm, Kongl. Carolinska Medico Chirurgiska Institutet, 1991, S-11281;II:1-16
- Raal FJ, Kalk WJ, Taylor DR, Osler CE, Panz VR: The relationship between the development and progression of microalbuminuria and arterial blood pressure in type 1 (insulin-dependent) diabetes mellitus. *Diabetes Res Clin Pract* 16:221-27, 1992
- Kofoed-Enevoldsen A, Borch-Johnsen K, Kreiner S, Nerup J, Deckert T: Declining incidence of persistent proteinuria in Type 1 (insulin-dependent) diabetic patients in Denmark. *Diabetes* 36:205-209, 1987
- Parving H-H, Hommel E, Mathiesen E, Skott P, Edsberg B, Bahnsen M, Lauritzen M, Hougaard P, Lauritzen E: Prev-

- alence of microalbuminuria, arterial hypertension, retinopathy and neuropathy in patients with insulin dependent diabetes. *Br Med J* 296:156–60, 1988
26. D'Antonio JA, Ellis D, Doft BH, Becker DJ, Drash AL, Kuller LH, Orchard TJ: Diabetes complications and glycemic control: The Pittsburgh Prospective Insulin-Dependent Diabetes Cohort Study status report after 5 yr of IDDM. *Diabetes Care* 12:694–700, 1989
  27. Krolewski AS, Warram JH, Christlieb AR, Busick EJ, Kahn CR: The changing natural history of nephropathy in type I diabetes. *Am J Med* 78:785–94, 1985
  28. Borch-Johnsen K, Nissen H, Salling N, Henriksen E, Kreiner S, Deckert T, Nerup J: The natural history of insulin-dependent diabetes in Denmark: 2. Long-term survival—who and why? *Diabetic Med* 4:211–16, 1987
  29. Deckert T, Poulsen JE: Diabetic nephropathy: fault or destiny? *Diabetologia* 21:178–83, 1981
  30. Bending JJ, Viberti GC, Bilous RW, Keen H for the Kroc Collaborative Study Group: Eight-month correction of hyperglycemia in insulin-dependent diabetes mellitus is associated with a significant and sustained reduction of urinary AERs in patients with microalbuminuria. *Diabetes* 34 (Suppl. 3):69–73, 1985
  31. Dahl-Jorgensen K, Hanssen KF, Kierulf P, Bjoro T, Sandvik L, Aagenaes O: Reduction of urinary albumin excretion after 4 years of continuous subcutaneous insulin infusion in insulin-dependent diabetes mellitus. *Acta Endocrinol* 117:19–25, 1988
  32. Viberti G, Mackintosh D, Bilous RW, Pickup JC, Keen H: Proteinuria in diabetes mellitus: role of spontaneous and experimental variation of glycemia. *Kidney Int* 21:714–20, 1982
  33. Barzilay J, Warram JH, Bak M, Laffel LMB, Canessa M, Krolewski AS: Predisposition to hypertension: risk factor for nephropathy and hypertension in IDDM. *Kidney Int* 41:723–30, 1992
  34. Microalbuminuria Collaborative Study Group, United Kingdom: Risk factors for development of microalbuminuria in insulin dependent diabetic patients: a cohort study. *Br Med J* 306:235–239, 1993
  35. Molitch ME, Steffes MW, Cleary PA, Nathan DM: Baseline analysis of renal function in the diabetes control and complications trial. *Kidney Int* 43:668–74, 1993
  36. Diamond JR: The role of cholesterol in glomerular injury. In *Contemporary Issues in Nephrology*. 2nd ed. Keane W, Ed. New York, Churchill Livingstone, 1991, p. 109–26
  37. Woods JW, Falk RJ, Pittman AW, Klemmer PJ, Watson BS, Nambodiri K: Increased red-cell sodium-lithium countertransport in normotensive sons of hypertensive parents. *N Engl J Med* 306:593–95, 1982
  38. Krolewski AS, Canessa M, Warram JH, Laffel LMB, Christlieb AR, Knowler WC, Rand LI: Predisposition to hypertension and susceptibility to renal disease in insulin-dependent diabetes mellitus. *N Engl J Med* 318:140–45, 1988
  39. Mangili R, Bending JJ, Scott G, Li LK, Gupta A, Viberti G: Increased sodium-lithium countertransport activity in red cells of patients with insulin-dependent diabetes and nephropathy. *N Engl J Med* 318:146–50, 1988
  40. Duhm J, Behr J: Role of exogenous factors in alterations of red cell  $\text{Na}^+\text{-Li}^+$  exchange and  $\text{Na}^+\text{-K}^+$  cotransport in essential hypertension, primary hyperaldosteronism, and hypokalemia. *Scand J Clin Lab Invest* 46 (Suppl. 180):82–95, 1986
  41. Jones SL, Trevisan R, Tariq T, Semplicini A, Mattock M, Walker JD, Nosadini R, Viberti G: Sodium-lithium countertransport in microalbuminuric insulin-dependent diabetic patients. *Hypertension* 15:570–75, 1990
  42. Canali M, Borghi L, Sani E, Curti A, Montanari A, Novarini A, Borghetti A: Increased erythrocyte lithium-sodium countertransport in essential hypertension: its relationship to family history of hypertension. *Clin Sci* 61 (Suppl. 7):13s–15s, 1981
  43. Clegg G, Morgan DB, Davidson C: The heterogeneity of essential hypertension. Relation between lithium efflux and sodium content of erythrocytes and a family history of hypertension. *Lancet* 2:891–94, 1982
  44. Elving LD, Wetzels JFV, de Nobel E, Berden JHM: Erythrocyte sodium-lithium countertransport is not different in type I (insulin-dependent) diabetic patients with and without diabetic nephropathy. *Diabetologia* 34:126–28, 1991
  45. Deckert T, Feldt-Rasmussen B, Borch-Johnsen K, Jensen T, Kofoed-Enevoldsen A: Albuminuria reflects widespread vascular damage. The Steno hypothesis. *Diabetologia* 32:219–26, 1989
  46. Mogensen CE, Christensen CK, Vittinghus E: The stages in diabetic renal disease with emphasis on the stage of incipient diabetic nephropathy. *Diabetes* 32 (Suppl. 2):64–78, 1983
